# Supplementary material for: Relative Validity of a Short Food Frequency Questionnaire for Disadvantaged Families in Hong Kong
Source: Nutrients. 2023 Jun 8;15(12):2668. doi: 10.3390/nu15122668 (PMC10304536; doi:10.3390/nu15122668)
Supplement: Supplementary file 1 [file nutrients-15-02668-s001.zip › nutrients-2345216-supplementary.pdf]

Table S1. Comparison of food items included in the shortened and original version of FFQs.

| Food items from short FFQ   | Food items from original FFQ  |
|-----------------------------|-------------------------------|
| 1. Refined grains, cooked   | Rice                          |
|                             | Soft Rice                     |
|                             | Congee                        |
|                             | Noodles/Udon                  |
|                             | Instant Noodles               |
|                             | Rice Noodles                  |
|                             | Macaroni                      |
|                             | Pasta                         |
| 2. Whole grains, cooked     | Whole grains, cooked          |
| 3. Refined bread            | Chinese Steam Buns (Mann-Tau) |
|                             | Plain Rolls                   |
|                             | White Breads                  |
|                             | Sweet Rolls                   |
| 4. Whole grain bread        | Whole Wheat Breads            |
| 5. Refined cereals, dry     | Oatmeal                       |
|                             | Corn Flakes                   |
|                             | Frosties                      |
| 6. Whole grain cereals, dry | Whole grain cereals, dry      |
| 7. Fresh fruits             | Oranges                       |
|                             | Grapefruits                   |
|                             | Apples                        |
|                             | Pears                         |
|                             | Bananas                       |
|                             | Honeydew Melons               |
|                             | Watermelon                    |
|                             | Pineapples                    |
|                             | Strawberries                  |
|                             | Peaches                       |
|                             | Mangos                        |
|                             | Persimmons                    |
|                             | Kiwi fruits                   |
|                             | Apricots                      |
|                             | Prunes                        |
|                             | Grapes                        |
|                             | Lychee                        |

|                                |                     |
|--------------------------------|---------------------|
|                                | Longans             |
|                                | Cherries            |
|                                | Papayas             |
|                                | Pomelo              |
| 8. Dried fruits                | Dried Apricot       |
|                                | Dried Prunes        |
|                                | Raisins             |
|                                | Dried Dates         |
| 9. Vegetables/Squash/Root/Stem | Choy Sum            |
|                                | Bok Choy            |
|                                | Chinese Kale        |
|                                | Broccoli            |
|                                | Cauliflowers        |
|                                | Chinese Spinach     |
|                                | Watercress          |
|                                | Spinach             |
|                                | Water Spinach       |
|                                | Pea Shoots          |
|                                | Cabbages            |
|                                | Celery Cabbages     |
|                                | Lettuce             |
|                                | Celery              |
|                                | Carrots             |
|                                | Chinese Radish      |
|                                | Sweet Potatoes      |
|                                | Potatoes            |
|                                | Pumpkins            |
|                                | Lotus Roots         |
|                                | Water Chestnuts     |
|                                | Bamboo Shoots       |
|                                | Hairy Melons        |
|                                | Cucumbers           |
|                                | Bitter Melons       |
|                                | Winter Melons       |
|                                | Tomatoes            |
|                                | Red Capsicum/pepper |
|                                | Green Capsicum      |

|                          |                           |
|--------------------------|---------------------------|
|                          | Sweet Corns               |
|                          | Canned Corns              |
|                          | Angled Loofah             |
|                          | Eggplants                 |
|                          | Mungbean Sprouts          |
|                          | Soybean Sprouts           |
| 10. Prebiotic vegetables | Asparagus                 |
|                          | Onions                    |
|                          | Chinese Chives            |
| 11. Meat                 | Pork, Lean                |
|                          | Spare Ribs, Lean & Fat    |
|                          | Spare Ribs, Lean          |
|                          | Pork, Lean & Fat          |
|                          | Pork Chop                 |
|                          | Beef Flank                |
|                          | Beef Sirloin              |
|                          | Briskets                  |
|                          | Lamb                      |
| 12. Poultry              | Chicken, with skin        |
|                          | Chicken, without skin     |
|                          | Chicken Strips            |
|                          | Chicken wing, mid section |
|                          | Chicken Thigh             |
|                          | Goose, with skin          |
|                          | Goose, no skin            |
|                          | Duck, with skin           |
|                          | Duck, no skin             |
|                          | Baby Pigeons              |
| 13. Fish                 | Grass Fish                |
|                          | Big Head Fish             |
|                          | Mud Carp                  |
|                          | Eel                       |
|                          | Japanese eel              |
|                          | Blace                     |
|                          | Golden Thread/Horse Head  |
|                          | Kwai Fa Fish              |
|                          | Snake Head                |

|                                 |                                       |
|---------------------------------|---------------------------------------|
|                                 | Carp                                  |
|                                 | Catfish                               |
|                                 | Grouper                               |
|                                 | Mackerel                              |
|                                 | Ribbon Fish                           |
|                                 | Big Eye Fish                          |
|                                 | Canned Sardines                       |
|                                 | Tuna Fish                             |
|                                 | Salmons                               |
| 14. Other seafood and shellfish | Squid                                 |
|                                 | Oysters                               |
|                                 | Prawns                                |
|                                 | Crabs                                 |
|                                 | Scallops/Dried Scallops               |
|                                 | Sea Cucumbers                         |
|                                 | Cuttlefish                            |
|                                 | Jelly Fish                            |
| 15. Processed or marinated food | BBQ Pork, Lean & Fat                  |
|                                 | Roast Pork, Lean                      |
|                                 | Roast Pork, Lean & Fat (with 24% fat) |
|                                 | Hot Dogs                              |
|                                 | Big Red Sausage                       |
|                                 | Chinese Sausage                       |
|                                 | Chinese liver sausage                 |
|                                 | Pork, Dried, Preserved & Salted       |
|                                 | Ham                                   |
|                                 | Canned luncheon Meat                  |
|                                 | Hamburger Patties                     |
|                                 | Fish Balls                            |
|                                 | Fish Cakes                            |
|                                 | Mud Carp Fish Balls                   |
| 16. Animal livers               | Pig Liver                             |
|                                 | Chicken Liver                         |
| 17. Eggs                        | Hard Boiled Eggs                      |
|                                 | Quail Eggs                            |
| 18. Whole milk                  | Whole Milk                            |
|                                 | Chocolate Milk                        |

|                                |                         |
|--------------------------------|-------------------------|
|                                | Whole Milk Powder       |
| 19. Low fat milk               | Low fat milk            |
| 20. Skimmed milk               | Skimmed Milk            |
|                                | Skim Milk Powder        |
| 21. Dairy products (yogurt)    | Whole Fat Yogurt        |
|                                | Low Fat Yogurt          |
| 22. Dairy products (cheese)    | Cheese                  |
| 23. Dairy products (ice-cream) | Ice Cream               |
|                                | Ice Cream Cone          |
|                                | Ice cream bar           |
| 24. Other plant-based milk     | Other plant-based milk  |
| 25. Soy milk                   | Soy Milk                |
|                                | Vitasoy                 |
| 26. Soy and soy products       | Tofu                    |
|                                | Dried Tofu Sheets       |
|                                | Deep Fried Tofu         |
|                                | Deep Fried Tofu Pockets |
|                                | Tofu Skin               |
|                                | Vegetarian Chicken      |
|                                | Baked Beans             |
|                                | Fresh Soybeans          |
|                                | Tofu Fa                 |
| 27. Other legumes              | Red Bean                |
|                                | Black Eye Peas          |
|                                | Snap Beans              |
|                                | Snow Peas               |
|                                | Green Peas              |
|                                | Broad Beans             |
|                                | String Beans            |
| 28. Fungi and seaweeds         | Fresh Mushrooms         |
|                                | Dried Mushrooms         |
|                                | Canned Mushroom         |
|                                | Wood Fungus             |
|                                | Black Moss              |
| 29. Nuts and seeds             | Chestnut                |
|                                | Cashew Nuts             |
|                                | Peanut                  |

|                                        |                                                |
|----------------------------------------|------------------------------------------------|
| 30. Sugary snacks (desserts)           | Milk Pudding                                   |
|                                        | Chinese Sweet Soup Desserts                    |
| 31. Sugary snacks (candies)            | Milk Chocolate                                 |
|                                        | Candies                                        |
| 32. Sugary snacks (cakes)              | Spongy Cake                                    |
|                                        | Pound Cake                                     |
| 33. Sugary snacks (biscuits)           | Egg Tart                                       |
|                                        | Semi-sweet Biscuits                            |
|                                        | Chocolate Coated Biscuits                      |
|                                        | Walnut Short Cakes                             |
| 34. Soft drinks or sweetened beverages | Coca Cola                                      |
|                                        | Fanta Orange                                   |
|                                        | Sprite                                         |
|                                        | Yakult                                         |
|                                        | Canned/Bottled Juices                          |
| 35. Diet or low sugar drinks           | Diet coke                                      |
| 36. Sweetened tea or coffee            | Coffee                                         |
| 37. Unsweetened tea                    | Chinese Tea                                    |
|                                        | Green Tea                                      |
|                                        | English Tea                                    |
| 38. Unsweetened coffee                 | Unsweetened coffee                             |
| 39. Water                              | Plain Water                                    |
|                                        | Mineral Water                                  |
| 40. Fried food (dishes)                | Chicken Nuggets                                |
| 41. Fried food (snacks)                | French Fries                                   |
|                                        | Potato Chips                                   |
|                                        | Hash Brown                                     |
| 42. Dim sum (dumplings)                | Steamed Dim Sum                                |
|                                        | Wonton                                         |
| 43. Dim sum (meat buns)                | BBQ Pork Bun                                   |
| 44. Dim sum (sweet buns)               | Sweet Bun w/ Lotus Seed Paste/Egg Yolk Filling |
| 45. Dim sum (Chinese cakes)            | Chinese Turnip Cake                            |
| 46. Dim sum (rice rolls)               | Steamed Cheung Fan (Steamed Rice Rolls)        |
| 47. Dim sum (fried)                    | Deep Fried Dumplings                           |
| 48. Dim sum (other savory)             | Chicken Paw                                    |
|                                        | Spare Ribs, Lean & Fat                         |
| 49. Taste preference                   | Taste preference                               |

|                                                                                                                                                                                                                                                                                                                                                                                                                                                                                                                                                                                                                                                                                                                                                                                                                                                                                                                                                                                                                                                            |      |
|------------------------------------------------------------------------------------------------------------------------------------------------------------------------------------------------------------------------------------------------------------------------------------------------------------------------------------------------------------------------------------------------------------------------------------------------------------------------------------------------------------------------------------------------------------------------------------------------------------------------------------------------------------------------------------------------------------------------------------------------------------------------------------------------------------------------------------------------------------------------------------------------------------------------------------------------------------------------------------------------------------------------------------------------------------|------|
| 50. Oils                                                                                                                                                                                                                                                                                                                                                                                                                                                                                                                                                                                                                                                                                                                                                                                                                                                                                                                                                                                                                                                   | Oils |
| <b>Original FFQ food items that are not included in the shortened FFQ:</b> <ul style="list-style-type: none"> <li>• Wheat Gluten</li> <li>• Preserved Radish</li> <li>• Lemons</li> <li>• Fruit Cocktail in Syrup</li> <li>• Chicken Heart</li> <li>• Pig Heart</li> <li>• Pig Kidneys</li> <li>• Beef Offal</li> <li>• Dried Oysters</li> <li>• Fried Dace with Black Bean Sauce</li> <li>• Salted Preserved Fish</li> <li>• Century Eggs</li> <li>• Salted Duck Eggs</li> <li>• Condensed Milk</li> <li>• Evaporated Milk</li> <li>• Milk Shake</li> <li>• Mayonnaise</li> <li>• Chocolate Power Drink</li> <li>• Horlick</li> <li>• Ovaltine</li> <li>• Fresh Fruit Juices</li> <li>• Wine</li> <li>• Spirits</li> <li>• Light Beer</li> <li>• Beer</li> <li>• “Yau-Char-Kwai” (Deep Fried Dough)</li> <li>• Pizza</li> <li>• Hamburger</li> <li>• Fish Burger</li> <li>• Pork Pie</li> <li>• Apple Pie</li> <li>• Glazed Beef Jerky</li> <li>• Glazed Pork Jerky</li> <li>• Beef Floss</li> <li>• Pork Floss</li> <li>• Dried Squid Strings</li> </ul> |      |

- Saltines/Cream Crackers
- Honey
- Jam
- Peanut Butter
- Corn Syrup
- Herbs & Lean Pork Soup
- Carrots & Green Turnips Soup
- Watercress Soup
- Radish & Mud Carp Dace Soup
- Cabbages & Potatoes Soup
- Peanuts Chicken Paws Soup
- Split Peas & Peanut Soup
- Hairy Melons & Octopus Soup
- Cream of Chicken Soup
- Vegetable & Tofu Soup

Abbreviation: food frequency questionnaire (FFQ).
